# Supplementary material for: The RhoJ-BAD signaling network: An Achilles’ heel for BRAF mutant melanomas
Source: PLoS Genet. 2017 Jul 28;13(7):e1006913. doi: 10.1371/journal.pgen.1006913 (PMC5549996; doi:10.1371/journal.pgen.1006913)
Supplement: S1 Dataset — RNA samples were obtained from RhoJ wildtype (n = 5) and knockout (n = 5) mice and subjected to RNA sequencing and analysis with Tuxedo Suite as previously described [50]. Briefly, the RNA-sequencing reads were aligned to the mouse (Mus musculus; mm10) genome using TopHat. Transcripts were assembled and compared with Cufflinks and Cuffdiff, respectively, to find differentially expressed genes between the two groups. Apoptosis tab: List of apoptosis genes regulated by RhoJ. (XLSX) [file pgen.1006913.s006.xlsx]

## Sheet: sorted_genelist.csv
	baseMean	log2FoldChange	lfcSE	stat	pvalue	padj
2610507I01Rik	669.421	3.2119	0.107262	29.9443	5.22e-197	8.59e-193
Rab6b	679.198	3.10624	0.288352	10.7724	4.65e-27	9.56e-24
1700030C10Rik	55.6235	3.10421	0.297918	10.4197	2.02e-25	3.32e-22
Rpph1	11.5874	2.14314	0.334754	6.40215	1.53e-10	7e-08
Rmrp	12.6989	2.06721	0.343114	6.02484	1.69e-09	5.8e-07
Spag17	43.3932	1.9957	0.319013	6.25586	3.95e-10	1.51e-07
5830444B04Rik	95.5398	1.92682	0.323425	5.95753	2.56e-09	7.8e-07
4930572O03Rik	14.2338	1.71665	0.333652	5.14502	2.67e-07	4.49e-05
A2m	117.393	1.6856	0.34215	4.92648	8.37e-07	0.000116774
Mir6236	123.672	1.68168	0.200702	8.37901	5.34e-17	5.86e-14
Ccdc37	827.877	1.66505	0.215507	7.72619	1.11e-14	9.6e-12
Grm7	18.5949	1.6645	0.293619	5.66891	1.44e-08	3.53e-06
Opcml	1008.94	1.65422	0.294213	5.62252	1.88e-08	4.49e-06
Xkr7	637.152	1.65258	0.34607	4.77527	1.79e-06	0.000209474
Rn45s	60556.2	1.63059	0.148093	11.0105	3.4e-28	7.99e-25
C920006O11Rik	133.783	1.57508	0.249373	6.31615	2.68e-10	1.1e-07
Lars2	13330.5	1.57472	0.128707	12.2349	2.02e-34	6.66e-31
Saa2	37.1534	1.5539	0.343582	4.52265	6.11e-06	0.000534634
Ccl2	2151.64	1.54862	0.223063	6.9425	3.85e-12	2.44e-09
Cxcl5	280.297	1.4954	0.34559	4.32709	1.51e-05	0.00106269
Gm16907	126.881	1.49026	0.192499	7.74164	9.81e-15	9.5e-12
3830403N18Rik	27.2007	1.48805	0.326957	4.55122	5.33e-06	0.000482312
Reln	1954.09	1.46977	0.329883	4.45542	8.37e-06	0.000675489
C130026I21Rik	51.9346	1.4445	0.227634	6.3457	2.21e-10	9.59e-08
Slc5a12	14.2822	1.43871	0.320522	4.48863	7.17e-06	0.000592832
Gcg	443.105	1.4278	0.345341	4.13446	3.56e-05	0.0020775
Gm14322	529.874	1.40755	0.306907	4.58626	4.51e-06	0.000421978
Gm5	13.445	1.39493	0.345171	4.04128	5.32e-05	0.00283138
Foxc2	225.099	1.38844	0.283283	4.90126	9.52e-07	0.000126388
A330093E20Rik	37.93	1.38441	0.312556	4.42933	9.45e-06	0.000723603
Celf3	35.2574	1.367	0.230796	5.92297	3.16e-09	9.12e-07
Gm2447	16.5507	1.35477	0.321082	4.21937	2.45e-05	0.00156435
Fam69c	165.71	1.34558	0.32292	4.1669	3.09e-05	0.00188908
Gm16617	26.137	1.33797	0.306705	4.36241	1.29e-05	0.000924521
Nxpe2	44.5932	1.33068	0.255655	5.20499	1.94e-07	3.4e-05
Col28a1	8267.38	1.33046	0.301775	4.40878	1.04e-05	0.000781322
Zfp429	275.71	1.3174	0.155267	8.48473	2.16e-17	2.54e-14
Abca13	46.1595	1.31571	0.345936	3.80334	0.000142758	0.00584456
Scube1	2778.37	1.31454	0.327274	4.01663	5.9e-05	0.00307468
Mcpt2	70.8575	1.30694	0.345816	3.77929	0.000157275	0.00629788
Ccl11	8601.51	1.3037	0.269443	4.83852	1.31e-06	0.000160665
Ptx3	655.066	1.3031	0.279177	4.66763	3.05e-06	0.000315387
Rab11fip4	193.227	1.28594	0.323942	3.96967	7.2e-05	0.00346605
Rims1	265.827	1.27881	0.331973	3.85214	0.000117092	0.00503161
Gm4956	26.3202	1.26056	0.346055	3.64267	0.000269825	0.00908887
4933433G19Rik	34.9156	1.2474	0.23401	5.33054	9.79e-08	1.92e-05
Kng2	68.4185	1.24545	0.344928	3.61074	0.00030532	0.00986475
Vax2os	265.939	1.24512	0.310922	4.0046	6.21e-05	0.0031556
Saa1	204.559	1.24487	0.337123	3.69264	0.00022194	0.0080279
Rec8	25.1713	1.24346	0.337253	3.68701	0.000226901	0.00810052
Gpr83	9.82655	1.24021	0.341335	3.6334	0.000279711	0.00929997
2010005H15Rik	15.0684	1.23584	0.326812	3.78149	0.00015589	0.00628832
Nsun7	41.503	1.2232	0.269003	4.54716	5.44e-06	0.00048901
Kcnn2	361.934	1.22109	0.21409	5.70361	1.17e-08	3.02e-06
Pgr	75.9623	1.22094	0.30849	3.95781	7.56e-05	0.00359794
Synpr	223.66	1.18691	0.328572	3.61233	0.000303453	0.00986475
1810034E14Rik	100.016	1.1852	0.179962	6.58586	4.52e-11	2.33e-08
Ces1a	28.3433	1.1827	0.303742	3.89377	9.87e-05	0.00443827
Ramp3	328.329	1.17354	0.298238	3.93492	8.32e-05	0.00388016
Sycp2	35.0277	1.15339	0.310696	3.71227	0.000205405	0.00751234
Prkg2	348.767	1.14677	0.264089	4.34234	1.41e-05	0.00100437
Fndc1	7882.44	1.14247	0.269017	4.24682	2.17e-05	0.00141605
Ankrd55	56.6963	1.12978	0.26494	4.2643	2.01e-05	0.00133077
2810047C21Rik1	186.446	1.12594	0.309216	3.64127	0.000271291	0.00911206
Tulp2	43.6433	1.11961	0.241375	4.63847	3.51e-06	0.000354402
Vsig2	33.5132	1.1097	0.260922	4.25298	2.11e-05	0.0013887
Frmd3	573.167	1.10171	0.239499	4.60008	4.22e-06	0.000404113
Nrxn1	1244.94	1.08939	0.297448	3.66247	0.000249796	0.00865503
Tnk2os	21.1034	1.08511	0.260294	4.16881	3.06e-05	0.00188035
Enkur	38.8684	1.06825	0.230367	4.63717	3.53e-06	0.000354454
Gfra3	8854.25	1.05013	0.245271	4.2815	1.86e-05	0.00125214
Gm6377	131.727	1.03594	0.258134	4.01319	5.99e-05	0.00309312
Unc80	490.016	1.02289	0.257585	3.97108	7.15e-05	0.00346605
Gm13212	24.0736	1.02239	0.262818	3.89011	0.0001002	0.00448121
Glrx3	125.25	1.01817	0.157676	6.45738	1.07e-10	5.15e-08
Foxs1	1806.59	1.0092	0.245109	4.11735	3.83e-05	0.00220548
Usmg5	2618.52	1.0038	0.201965	4.97016	6.69e-07	9.66e-05
Cys1	1270.46	0.999406	0.213277	4.68595	2.79e-06	0.000292111
Ngf	195.223	0.996613	0.263646	3.78012	0.000156755	0.00629766
1600010M07Rik	50.5269	0.993666	0.220878	4.49871	6.84e-06	0.000574665
Olfml2a	7420.26	0.966499	0.242737	3.98167	6.84e-05	0.00337202
Shroom1	399.39	0.957869	0.258831	3.70075	0.000214963	0.00782714
Npas3	200.503	0.944327	0.238147	3.96531	7.33e-05	0.00349678
Plxdc1	3722.9	0.938517	0.252068	3.72327	0.000196656	0.00734922
Oacyl	77.6842	0.931883	0.24782	3.76031	0.0001697	0.00659818
Fbxl18	201.832	0.926165	0.187717	4.93383	8.06e-07	0.000113424
Lum	71727.8	0.92524	0.222893	4.15105	3.31e-05	0.00196635
Gatsl2	868.481	0.917575	0.142187	6.45328	1.09e-10	5.15e-08
Ccl7	706.975	0.917386	0.243718	3.76413	0.000167129	0.00654908
Zfhx4	1617.2	0.914696	0.25225	3.62615	0.000287678	0.00950724
A930006K02Rik	33.7741	0.902243	0.239342	3.76968	0.000163457	0.00646929
E030024N20Rik	187.04	0.895636	0.237645	3.7688	0.000164033	0.00646929
2610035D17Rik	414.566	0.888958	0.217848	4.08063	4.49e-05	0.00252287
Nnmt	1466.46	0.886992	0.140759	6.3015	2.95e-10	1.18e-07
Serpinb6c	570.99	0.874493	0.218797	3.99683	6.42e-05	0.00323108
Gm6548	746.202	0.870214	0.189675	4.58793	4.48e-06	0.000421012
Pdcd10	4759.32	0.863511	0.177213	4.87272	1.1e-06	0.000142642
Oaf	5445.36	0.86259	0.127054	6.78913	1.13e-11	6.19e-09
Wdr96	223.85	0.85675	0.0973576	8.80004	1.37e-18	1.73e-15
Idua	1130.86	0.851538	0.162902	5.22729	1.72e-07	3.08e-05
Cst3	50897.2	0.850522	0.181302	4.69119	2.72e-06	0.000288405
Ang	356.169	0.844513	0.212414	3.97579	7.01e-05	0.00342576
1810024B03Rik	62.8671	0.836421	0.228769	3.65619	0.000255993	0.00883257
1500015O10Rik	121.001	0.833182	0.229871	3.62456	0.000289452	0.0095467
Nudt7	679.059	0.831319	0.176661	4.70574	2.53e-06	0.000275351
Cyp4f18	656.237	0.829001	0.2144	3.8666	0.000110362	0.0048565
Zfp273	290.774	0.828032	0.155158	5.3367	9.47e-08	1.92e-05
Aph1b	775.102	0.813645	0.111017	7.32903	2.32e-13	1.91e-10
Polr2k	1252.61	0.80312	0.186	4.31784	1.58e-05	0.0010964
Zfp874a	606.543	0.794896	0.130466	6.09276	1.11e-09	3.97e-07
D330023K18Rik	82.3643	0.790329	0.18273	4.32513	1.52e-05	0.0010676
Bdh2	168.598	0.780685	0.166721	4.68258	2.83e-06	0.00029508
Atp5l	7183.03	0.774156	0.168362	4.59815	4.26e-06	0.000405509
Paqr6	1120.68	0.765386	0.155687	4.91619	8.82e-07	0.000120495
Triqk	512.628	0.765144	0.208399	3.67153	0.000241101	0.00844264
Pfdn4	842.902	0.761572	0.190065	4.00691	6.15e-05	0.00313754
1810022K09Rik	2016.85	0.759653	0.20601	3.68745	0.000226511	0.00810052
Tbca	4059.82	0.759212	0.119353	6.36107	2e-10	8.91e-08
4930579G18Rik	271.354	0.758831	0.196239	3.86687	0.000110243	0.0048565
Rpl22l1	5922.16	0.756159	0.181861	4.15791	3.21e-05	0.00194226
Gpr34	1071.01	0.745303	0.200254	3.72179	0.000197819	0.00734922
Crlf2	1160.77	0.74111	0.186038	3.98366	6.79e-05	0.0033627
40800	29509.7	0.727762	0.160479	4.53492	5.76e-06	0.000509881
Ndufc2	2502.78	0.717026	0.155285	4.61749	3.88e-06	0.000376019
Atp6v0e	5846.49	0.715514	0.139625	5.12455	2.98e-07	4.91e-05
Ndufb2	1691.01	0.707282	0.180452	3.91951	8.87e-05	0.00408048
2810433D01Rik	202.672	0.706797	0.16147	4.37727	1.2e-05	0.000871308
Ccdc28b	806.991	0.706656	0.0971318	7.27522	3.46e-13	2.71e-10
Slirp	418.442	0.70544	0.156759	4.50016	6.79e-06	0.000574665
1500011K16Rik	939.967	0.705044	0.108068	6.52408	6.84e-11	3.41e-08
Tmsb4x	89392	0.700917	0.100569	6.96952	3.18e-12	2.09e-09
Pigyl	579.166	0.69673	0.0901784	7.72613	1.11e-14	9.6e-12
Uqcr10	2554.41	0.694243	0.143744	4.82974	1.37e-06	0.00016667
Pet100	678.03	0.692719	0.156146	4.43635	9.15e-06	0.000706963
Agtr1a	1084.96	0.688205	0.180161	3.81994	0.000133482	0.00557575
Rps27l	4266.36	0.685179	0.143646	4.7699	1.84e-06	0.000212132
Phactr1	792.953	0.684919	0.133308	5.13786	2.78e-07	4.62e-05
Rcn2	5155.77	0.684339	0.115591	5.92034	3.21e-09	9.12e-07
Phip	4352.61	0.683066	0.189122	3.61177	0.000304113	0.00986475
Spcs1	6664.47	0.681648	0.133409	5.10948	3.23e-07	5.26e-05
Pigp	1758.9	0.679953	0.13748	4.94582	7.58e-07	0.000108516
Thnsl1	301.98	0.678111	0.167505	4.0483	5.16e-05	0.00277484
Atp5k	3005.88	0.674958	0.127643	5.28785	1.24e-07	2.37e-05
Sec61g	4208.6	0.674875	0.133557	5.05307	4.35e-07	6.81e-05
Cetn3	3818.59	0.669541	0.138165	4.84595	1.26e-06	0.000158308
Zfp738	472.8	0.666182	0.133414	4.99336	5.93e-07	8.8e-05
BC051226	128.716	0.663693	0.143393	4.62851	3.68e-06	0.00036491
S100a6	30569.7	0.660273	0.153682	4.29636	1.74e-05	0.00117594
4933439C10Rik	540.57	0.656317	0.0992803	6.61075	3.82e-11	2.03e-08
Rps15a	23549.3	0.655954	0.181191	3.62023	0.000294342	0.00964997
Malsu1	526.421	0.649137	0.147783	4.39249	1.12e-05	0.000830752
Lekr1	461.664	0.646268	0.173892	3.7165	0.000202005	0.00743757
Lst1	219.402	0.645258	0.147882	4.36332	1.28e-05	0.000924521
Tctex1d2	382.147	0.644422	0.149974	4.29689	1.73e-05	0.00117594
Ndufb4	2621.78	0.643561	0.142434	4.51831	6.23e-06	0.000542801
Col5a2	105335	0.642946	0.146679	4.38334	1.17e-05	0.000854899
Malat1	19898.9	0.639163	0.0894097	7.14869	8.76e-13	6.27e-10
Mrps18c	1238.81	0.633528	0.163653	3.87116	0.000108318	0.00480511
2010320M18Rik	450.82	0.623638	0.149954	4.15886	3.2e-05	0.00194226
2310039H08Rik	413.714	0.623339	0.150771	4.13434	3.56e-05	0.0020775
5730508B09Rik	1431.09	0.621248	0.153593	4.04476	5.24e-05	0.0027988
Ecm1	9787.22	0.618921	0.160799	3.84904	0.000118582	0.00508068
Chchd1	1278.2	0.617266	0.143311	4.30717	1.65e-05	0.00113305
Fam174a	2175.32	0.6168	0.163534	3.77169	0.000162145	0.00645852
Cox16	1058.2	0.61104	0.150518	4.05957	4.92e-05	0.00267932
Cox7a2	3756.63	0.599801	0.132965	4.51095	6.45e-06	0.000559031
Dennd6b	508.044	0.591847	0.134244	4.40875	1.04e-05	0.000781322
Cox7b	4591.55	0.591635	0.137154	4.31364	1.61e-05	0.00111048
Snhg18	1863.77	0.590743	0.143107	4.12799	3.66e-05	0.00212768
Uqcc2	2095.32	0.588667	0.118084	4.98516	6.19e-07	9.08e-05
Slc4a3	1655.83	0.58686	0.143881	4.07878	4.53e-05	0.0025343
Cox6c	6766.28	0.578846	0.118459	4.88647	1.03e-06	0.000134094
Smpdl3a	5988.87	0.575897	0.141871	4.05929	4.92e-05	0.00267932
Shfm1	5790.56	0.568722	0.111513	5.10004	3.4e-07	5.48e-05
Dfna5	145.308	0.567962	0.139022	4.08542	4.4e-05	0.00247986
Sec22a	1543.78	0.566337	0.101241	5.59397	2.22e-08	5.22e-06
4930414L22Rik	196.898	0.563018	0.154451	3.64528	0.000267099	0.00902652
Rsl1	212.883	0.562729	0.140825	3.99594	6.44e-05	0.00323324
Fancc	1200.58	0.558746	0.103557	5.39556	6.83e-08	1.44e-05
Snx25	1686.16	0.558176	0.148496	3.75887	0.000170681	0.0066048
1110001J03Rik	387.964	0.549937	0.130965	4.19912	2.68e-05	0.00167681
Selm	4997.82	0.54712	0.143315	3.81761	0.000134753	0.00560042
Sft2d1	1957.5	0.542763	0.121002	4.48556	7.27e-06	0.000598443
Cbx7	1777.27	0.540754	0.148574	3.63962	0.000273043	0.00915222
Med21	1917.85	0.538263	0.145823	3.69121	0.00022319	0.00805541
Crls1	1594.59	0.533568	0.139647	3.82085	0.000132993	0.00556948
Uqcrq	2532.9	0.532677	0.144968	3.67443	0.000238377	0.00836507
Polr2i	724.611	0.528691	0.117925	4.48327	7.35e-06	0.000601887
Megf8	6899.45	0.528124	0.136667	3.8643	0.000111408	0.00488949
C1galt1c1	1695.08	0.52429	0.126401	4.14784	3.36e-05	0.001987
Gpx4	9367.51	0.52072	0.140057	3.71792	0.000200871	0.00742908
Arsk	1447.01	0.519009	0.124956	4.15354	3.27e-05	0.00195214
Mettl10	913.13	0.51867	0.0972513	5.3333	9.64e-08	1.92e-05
Klhl9	6378.69	0.517356	0.102754	5.03488	4.78e-07	7.35e-05
Zc2hc1a	2099.97	0.510437	0.10061	5.0734	3.91e-07	6.18e-05
Srrd	459.042	0.507981	0.0923384	5.5013	3.77e-08	8.35e-06
Tceb2	4558.34	0.505732	0.140075	3.61043	0.000305689	0.00986475
Rabac1	5033.07	0.49958	0.113351	4.40737	1.05e-05	0.000782764
Pla2g12a	791.792	0.499164	0.138302	3.60923	0.000307104	0.00989102
Serhl	993.552	0.495339	0.0943897	5.2478	1.54e-07	2.81e-05
2410015M20Rik	2268.02	0.490901	0.131017	3.74684	0.000179076	0.00687001
Tomm7	2394.26	0.489432	0.124309	3.93722	8.24e-05	0.00385409
Ring1	1445.96	0.488808	0.0968911	5.04493	4.54e-07	7.04e-05
Ndufa2	2719.71	0.486977	0.0913121	5.33311	9.65e-08	1.92e-05
Zfp932	1921.24	0.480216	0.128219	3.74527	0.000180198	0.00689696
Cd302	4891.58	0.478112	0.117638	4.06427	4.82e-05	0.00266109
Uxt	318.369	0.474369	0.125051	3.79339	0.000148604	0.00602395
Immp1l	1373.72	0.471566	0.129055	3.65398	0.000258209	0.00883725
Ndufa7	2095.16	0.469389	0.0949893	4.94149	7.75e-07	0.000109994
Ahr	7328.52	0.469234	0.122612	3.82699	0.000129722	0.00547971
Btbd9	1834.12	0.469169	0.109824	4.272	1.94e-05	0.00129087
Paqr7	2120.92	0.458261	0.107126	4.27778	1.89e-05	0.00126288
Prss23	15428.1	0.455408	0.0949141	4.79811	1.6e-06	0.000191324
Tmem205	801.381	0.449874	0.108662	4.14012	3.47e-05	0.00204769
Def8	4794.19	0.438946	0.0830575	5.28485	1.26e-07	2.38e-05
Tm2d1	1390.46	0.438852	0.117519	3.73431	0.000188234	0.00715463
Atp5j2	3982.51	0.438213	0.109334	4.00803	6.12e-05	0.00313754
Tmem29	673.841	0.437777	0.0796001	5.4997	3.8e-08	8.35e-06
Ap3s1	3766.59	0.436943	0.11443	3.81842	0.000134307	0.00559601
Tomm5	1609.3	0.434916	0.11269	3.85939	0.000113669	0.00494912
Atp5e	4197.84	0.434778	0.109157	3.98304	6.8e-05	0.0033627
Ndufb11	4593.94	0.433014	0.10003	4.32882	1.5e-05	0.00106047
Nenf	2497.53	0.432161	0.0908437	4.75719	1.96e-06	0.000222813
Myeov2	1533.64	0.430796	0.109074	3.94959	7.83e-05	0.00369177
Naa38	498.213	0.430157	0.0949125	4.53214	5.84e-06	0.000513882
Lsm3	1370.1	0.426252	0.0902665	4.72215	2.33e-06	0.000259504
Mrps24	1049.74	0.425584	0.104664	4.06619	4.78e-05	0.00264996
Ssr4	4150.7	0.424634	0.102185	4.15553	3.25e-05	0.00194226
Mcfd2	6159.24	0.421296	0.070672	5.96129	2.5e-09	7.77e-07
Tmem256	1880.2	0.420767	0.104401	4.0303	5.57e-05	0.00294788
Kdelr3	2781.34	0.42021	0.0996989	4.2148	2.5e-05	0.00158864
Drap1	5059.6	0.419538	0.0921471	4.55292	5.29e-06	0.000481074
Fundc2	3455.29	0.419044	0.0718358	5.83335	5.43e-09	1.49e-06
Sirt3	751.509	0.417389	0.103	4.05232	5.07e-05	0.00274545
Ifitm2	9672.86	0.412448	0.0973737	4.23572	2.28e-05	0.00147616
Mcee	872.013	0.408668	0.0895116	4.56554	4.98e-06	0.000458086
Commd1	2222.69	0.405766	0.11105	3.65391	0.000258277	0.00883725
Gm561	316.815	0.403496	0.108326	3.72482	0.000195456	0.00734922
Abhd10	876.717	0.396548	0.0979737	4.0475	5.18e-05	0.00277524
Gm16039	839.64	0.391473	0.0904409	4.32849	1.5e-05	0.00106047
Ndufb3	2257.44	0.387704	0.0990274	3.91512	9.04e-05	0.0041195
Kifc2	937.735	0.386015	0.0835046	4.62268	3.79e-06	0.000371095
Dnajb14	293.387	0.384045	0.100082	3.83731	0.000124388	0.00528987
Commd3	3820.67	0.383266	0.104855	3.65521	0.00025697	0.00883725
Rnaseh2c	833.427	0.380833	0.0922732	4.12723	3.67e-05	0.00212768
Hspb11	358.43	0.380134	0.0818543	4.64403	3.42e-06	0.000347126
Ccdc90b	1932.94	0.379854	0.0902555	4.20865	2.57e-05	0.00161377
Olfr613	625.968	0.378241	0.0849384	4.45312	8.46e-06	0.000679455
Mettl23	1262.91	0.378164	0.0991154	3.81539	0.000135965	0.00563657
Ube2w	2921.63	0.378122	0.0898132	4.21009	2.55e-05	0.00160968
Eme2	378.113	0.373649	0.100175	3.72995	0.00019152	0.00724606
Lxn	2296.57	0.371947	0.0986858	3.76901	0.000163899	0.00646929
Mcts2	304.437	0.367595	0.0879268	4.18069	2.91e-05	0.00180494
Psma4	6488.56	0.365325	0.0945662	3.86317	0.000111927	0.00489918
Mrps11	939.587	0.360209	0.0917687	3.92518	8.67e-05	0.00400708
Eno2	1052.32	0.354314	0.096044	3.68908	0.000225064	0.00810052
Setd1b	2575.01	0.351175	0.0876473	4.00669	6.16e-05	0.00313754
Tmed3	4990.73	0.349525	0.0870983	4.013	6e-05	0.00309312
Dpm3	710.657	0.349407	0.0947962	3.68588	0.000227916	0.0081016
Tmem219	1228.17	0.348673	0.0838923	4.1562	3.24e-05	0.00194226
Nip7	1757.77	0.345249	0.0951115	3.62994	0.000283487	0.00939816
Tmem68	1886.58	0.327441	0.088891	3.68362	0.000229942	0.00815602
Trnau1ap	1129.75	0.326847	0.0840605	3.88823	0.000100976	0.00450369
Fance	1321.87	0.326007	0.0649114	5.02233	5.1e-07	7.71e-05
Bad	1553.91	0.323626	0.0744265	4.34826	1.37e-05	0.000981895
Bloc1s1	2568.82	0.322955	0.0822785	3.92515	8.67e-05	0.00400708
Kmt2b	4426.17	0.322476	0.0550352	5.85945	4.64e-09	1.3e-06
Smim11	1114.31	0.321015	0.0579832	5.53635	3.09e-08	7.16e-06
Pitpnm2	1933.36	0.320478	0.0770975	4.1568	3.23e-05	0.00194226
Rpap2	818.943	0.319266	0.0838283	3.80858	0.000139768	0.00575415
H2-Ke6	1498.47	0.318113	0.0790124	4.02611	5.67e-05	0.00298174
Tmem9	1854.49	0.317805	0.0675564	4.70429	2.55e-06	0.000275351
Sec61b	2680.97	0.316938	0.070464	4.49788	6.86e-06	0.000574665
Ncor2	10739.3	0.31569	0.0848776	3.71936	0.000199729	0.00740349
Rab4a	456.435	0.314263	0.0842476	3.73023	0.000191305	0.00724606
Lemd2	3230.91	0.309406	0.076924	4.02223	5.76e-05	0.00301207
Hectd3	3701.64	0.307832	0.044547	6.91028	4.84e-12	2.95e-09
Stk11ip	2326.02	0.297019	0.0612644	4.84815	1.25e-06	0.000157768
Wrnip1	2525.65	0.293194	0.0633134	4.63083	3.64e-06	0.000363271
Med6	1152.89	0.293143	0.0692986	4.23014	2.34e-05	0.00150732
Bet1l	2115.37	0.291262	0.0648054	4.49441	6.98e-06	0.000579878
Srp14	4239.45	0.289002	0.0736094	3.92616	8.63e-05	0.00400708
Tmem258	1858.48	0.286112	0.0730153	3.91852	8.91e-05	0.00408048
Rgl2	5372.4	0.285695	0.0758562	3.76627	0.000165702	0.00650865
Phb	4230.94	0.28273	0.0689846	4.09845	4.16e-05	0.00236859
Spg21	2947.66	0.281281	0.0748108	3.75989	0.000169986	0.00659818
Ubxn6	2996.44	0.279507	0.0536943	5.20553	1.93e-07	3.4e-05
Wtip	1594.3	0.27813	0.0732835	3.79527	0.000147484	0.00600676
Tmem14c	3265.23	0.277989	0.0696004	3.99407	6.5e-05	0.00323924
Numbl	2988.13	0.276268	0.0756498	3.65194	0.000260269	0.0088502
Mief2	893.409	0.268459	0.0656625	4.08846	4.34e-05	0.00245592
Rab28	2976.17	0.26841	0.0510559	5.25717	1.46e-07	2.71e-05
Slx1b	1089.49	0.265368	0.0699309	3.79471	0.000147815	0.00600676
Itgb1bp1	1367.73	0.254795	0.0629056	4.05043	5.11e-05	0.0027587
Coa6	544.555	0.253427	0.0678155	3.737	0.000186227	0.00709472
Tomm40l	1585.78	0.245564	0.0617598	3.97611	7.01e-05	0.00342576
Fam193b	6108.98	0.24058	0.0509329	4.72347	2.32e-06	0.000259504
Vps29	2752.8	0.229422	0.0580748	3.95046	7.8e-05	0.00368895
BC029214	861.917	0.229022	0.0626962	3.65289	0.00025931	0.0088502
Scnm1	1025.43	0.217493	0.0584045	3.72391	0.000196163	0.00734922
Fastk	3336.09	0.217202	0.0543777	3.99431	6.49e-05	0.00323924
Rfng	2001.18	0.196633	0.0542936	3.62165	0.000292725	0.00963534
Tmppe	1305.96	0.196513	0.0519888	3.77991	0.000156887	0.00629766
Tpd52l2	5604.43	0.193196	0.0425588	4.5395	5.64e-06	0.000501632
Myl12b	7615.77	0.183868	0.0497231	3.69785	0.000217437	0.00789973
Csnk1d	9682.01	-0.166126	0.0436016	-3.81008	0.000138921	0.00574463
Tceb3	4443.53	-0.176914	0.0409771	-4.31739	1.58e-05	0.0010964
Bcas3	1631.2	-0.189583	0.0450207	-4.21101	2.54e-05	0.00160929
Ryk	6154.57	-0.191617	0.0458497	-4.17925	2.92e-05	0.00180962
Arih1	6962.12	-0.19241	0.0416535	-4.61931	3.85e-06	0.000374957
Pik3c3	2158.14	-0.197668	0.0467519	-4.22802	2.36e-05	0.00151563
Bms1	3779.67	-0.198535	0.0550218	-3.6083	0.000308211	0.0099073
Ubl7	1919.61	-0.200177	0.0496846	-4.02896	5.6e-05	0.00295526
Ppfia1	5234.64	-0.201892	0.0438063	-4.60874	4.05e-06	0.000389912
Atg4b	2788.67	-0.203395	0.0560372	-3.62965	0.000283806	0.00939816
Thoc5	1774.58	-0.210494	0.0575941	-3.65478	0.000257406	0.00883725
Dym	1439.51	-0.212677	0.0546592	-3.89096	9.98e-05	0.00447767
Nup98	3113.12	-0.213495	0.0445572	-4.79149	1.66e-06	0.000194621
Atp6v1c1	2988.6	-0.213955	0.053437	-4.00387	6.23e-05	0.00315568
Fiz1	1266.93	-0.215437	0.0592357	-3.63694	0.000275896	0.00922905
Slc4a1ap	1278.38	-0.224083	0.0611558	-3.66413	0.000248176	0.00861705
Hnrnpm	13059.4	-0.224352	0.0450168	-4.98373	6.24e-07	9.08e-05
Capza1	10690.1	-0.226104	0.0557055	-4.05892	4.93e-05	0.00267932
Eif3a	19046.9	-0.22868	0.0401835	-5.69088	1.26e-08	3.15e-06
Med24	2912.33	-0.228896	0.0633923	-3.61079	0.000305272	0.00986475
Vipas39	2483.66	-0.230706	0.0554506	-4.16057	3.17e-05	0.00193504
Knop1	3003.58	-0.235148	0.0614487	-3.82674	0.000129851	0.00547971
Gabpb1	1526.2	-0.235841	0.0584764	-4.03309	5.5e-05	0.00292256
Fam175b	1951.81	-0.240071	0.0533437	-4.50045	6.78e-06	0.000574665
Eif3c	11793.5	-0.240372	0.0602591	-3.98897	6.64e-05	0.00329963
Yap1	8331.41	-0.243138	0.0659341	-3.6876	0.000226381	0.00810052
Hectd1	7750.61	-0.243412	0.0636303	-3.82541	0.000130555	0.00549534
Mcmbp	3603.67	-0.243984	0.0446862	-5.45993	4.76e-08	1.02e-05
Arf3	8719.23	-0.245634	0.0636084	-3.86166	0.00011262	0.00491646
Esf1	1651.34	-0.247941	0.0679151	-3.65075	0.000261476	0.00887295
Psen1	4534.37	-0.25051	0.0564445	-4.43816	9.07e-06	0.000706963
Ercc5	2185.7	-0.250579	0.0486589	-5.14971	2.61e-07	4.43e-05
Mob3c	1071.48	-0.254473	0.06789	-3.74831	0.00017803	0.00684584
Dync1li1	3293.5	-0.25633	0.0521481	-4.91543	8.86e-07	0.000120495
Mllt11	944.762	-0.256452	0.0569158	-4.50581	6.61e-06	0.000566765
Cstf1	1213.06	-0.257975	0.0554082	-4.65591	3.23e-06	0.000329729
Ctnnb1	49050.4	-0.264882	0.0563183	-4.70331	2.56e-06	0.000275351
Vcp	25284.4	-0.265149	0.0729449	-3.63493	0.00027806	0.00926378
Psmd1	7557.71	-0.268597	0.0554482	-4.8441	1.27e-06	0.000158434
Tra2a	6251.06	-0.269295	0.0716093	-3.76061	0.000169499	0.00659818
Cnot2	4406.33	-0.27125	0.0398836	-6.80105	1.04e-11	5.89e-09
Tmem87a	3682.47	-0.271493	0.058215	-4.66363	3.11e-06	0.000319576
Chtf8	5274.91	-0.274103	0.0675333	-4.05879	4.93e-05	0.00267932
Phactr4	2320.73	-0.274811	0.0704013	-3.90349	9.48e-05	0.00430577
R3hcc1l	1629.44	-0.278604	0.0750119	-3.71413	0.000203902	0.00747399
Vps26b	4370.12	-0.280585	0.0577931	-4.855	1.2e-06	0.000153593
Scyl2	2079.7	-0.285582	0.0624184	-4.57529	4.76e-06	0.000439698
Ube4a	4044.42	-0.286552	0.0564735	-5.07411	3.89e-07	6.18e-05
Asun	2394.6	-0.287383	0.0479823	-5.98936	2.11e-09	7.08e-07
Lrrc47	1684.42	-0.289987	0.0756971	-3.83089	0.000127681	0.0054159
Tpp2	4025	-0.290112	0.0731345	-3.96683	7.28e-05	0.00349482
Cwf19l1	770.514	-0.290614	0.076996	-3.7744	0.00016039	0.00640704
Mfsd1	5971.3	-0.294935	0.0793929	-3.71489	0.000203295	0.00746838
Nrd1	9347.13	-0.294987	0.0815665	-3.61651	0.000298596	0.00975059
Nek4	662.183	-0.299951	0.0758416	-3.95496	7.65e-05	0.00363054
Aqr	2843.96	-0.300791	0.075771	-3.96973	7.2e-05	0.00346605
Dnajc7	8024.82	-0.309033	0.0536195	-5.76346	8.24e-09	2.22e-06
Ints9	1275.27	-0.314787	0.0850217	-3.70243	0.000213542	0.00779264
Trp53	4719.08	-0.317169	0.0715979	-4.42986	9.43e-06	0.000723603
Sde2	2070.33	-0.319009	0.0615547	-5.18253	2.19e-07	3.75e-05
Atp2a2	15409.5	-0.319628	0.0825315	-3.87281	0.00010759	0.0047857
Impdh2	5964.85	-0.321024	0.0876043	-3.66448	0.000247844	0.00861705
Eprs	7901.59	-0.321495	0.0862771	-3.72631	0.000194307	0.00733465
Gemin5	1325.46	-0.322165	0.0851356	-3.78413	0.000154245	0.00623726
Dkc1	1960.09	-0.323369	0.0770499	-4.19688	2.71e-05	0.00168702
Srpr	9351.84	-0.329452	0.0554065	-5.94609	2.75e-09	8.22e-07
Calcoco1	5408.62	-0.337576	0.0616695	-5.47396	4.4e-08	9.53e-06
Ccdc166	269.354	-0.338416	0.0767408	-4.40986	1.03e-05	0.000781322
Usp15	2773.09	-0.34264	0.0746798	-4.58812	4.47e-06	0.000421012
Nol8	1228.34	-0.354208	0.0870977	-4.06679	4.77e-05	0.00264996
Tnpo3	4437.49	-0.3543	0.0629696	-5.62652	1.84e-08	4.45e-06
Fam21	4944.15	-0.357776	0.0840246	-4.25799	2.06e-05	0.00136338
Gid4	3936.96	-0.359219	0.0884669	-4.0605	4.9e-05	0.00267932
Srbd1	1144.23	-0.359455	0.0673189	-5.33959	9.32e-08	1.92e-05
Sgpl1	8905.85	-0.362014	0.0910739	-3.97495	7.04e-05	0.00342765
Casp2	2809.45	-0.366638	0.0958716	-3.82426	0.000131163	0.00550684
Zfp131	2696.43	-0.36675	0.0952973	-3.84848	0.000118852	0.00508068
Dclre1c	1513.61	-0.36977	0.084242	-4.38938	1.14e-05	0.00083759
Xbp1	9427.72	-0.380062	0.103864	-3.65922	0.000252984	0.00874708
Slc31a1	4167.11	-0.3802	0.103421	-3.67624	0.0002367	0.00832396
Fam178a	2593.68	-0.382552	0.0887292	-4.31145	1.62e-05	0.00111685
Mettl8	643.996	-0.38375	0.0904631	-4.24206	2.21e-05	0.00144073
Slc31a2	3797.48	-0.386608	0.0986607	-3.91856	8.91e-05	0.00408048
Wdtc1	3087.05	-0.391797	0.101562	-3.85771	0.000114454	0.00496345
Jarid2	2986.2	-0.398	0.094332	-4.21914	2.45e-05	0.00156435
Iars	3544.86	-0.398553	0.0566611	-7.03397	2.01e-12	1.38e-09
Supt16	3942.86	-0.3999	0.100843	-3.96558	7.32e-05	0.00349678
Zfp65	740.031	-0.403569	0.0858931	-4.6985	2.62e-06	0.000280082
Mis12	2063.56	-0.406525	0.101271	-4.01425	5.96e-05	0.00309312
Tubgcp4	712.128	-0.406583	0.0986531	-4.12134	3.77e-05	0.00217522
Desi2	2834.17	-0.407524	0.107098	-3.80514	0.000141722	0.00581662
Bai2	441.623	-0.410162	0.107912	-3.80088	0.000144183	0.00588827
Rassf3	2489.73	-0.415002	0.114898	-3.61192	0.000303941	0.00986475
Jrk	372.344	-0.41655	0.113137	-3.68183	0.000231565	0.00817832
Cdkl2	1133.79	-0.417488	0.11136	-3.74901	0.000177535	0.00684281
Tsr1	1139.49	-0.419425	0.0942366	-4.45076	8.56e-06	0.000683354
Skiv2l2	2624.45	-0.420233	0.0795871	-5.28016	1.29e-07	2.41e-05
Ssh2	2780.96	-0.42874	0.106581	-4.02266	5.75e-05	0.00301207
Eml4	2393.45	-0.432382	0.0859607	-5.02999	4.9e-07	7.47e-05
Tcp11l2	3559.61	-0.440409	0.0640697	-6.8739	6.25e-12	3.67e-09
Bcl6	3368.8	-0.4457	0.119741	-3.72219	0.000197503	0.00734922
Cdca7l	450.391	-0.446038	0.122455	-3.64246	0.000270049	0.00908887
Hsp90aa1	12605.5	-0.454968	0.116813	-3.89484	9.83e-05	0.00443827
Zfp949	5717.87	-0.460047	0.0964826	-4.76818	1.86e-06	0.00021246
Ipo7	4415.5	-0.494581	0.104448	-4.73521	2.19e-06	0.000246677
Pik3r1	9086.82	-0.495301	0.119748	-4.13621	3.53e-05	0.0020754
Prps2	2597.73	-0.504675	0.0876562	-5.75743	8.54e-09	2.27e-06
Fbxl12os	161.595	-0.506724	0.131364	-3.8574	0.000114601	0.00496345
1190007I07Rik	161.626	-0.515491	0.112571	-4.57923	4.67e-06	0.000433934
Cyfip2	998.076	-0.524933	0.142333	-3.68806	0.000225971	0.00810052
Gpatch11	1420.57	-0.529595	0.107867	-4.90971	9.12e-07	0.000123044
Nxpe3	686.562	-0.539713	0.147047	-3.67033	0.000242233	0.00844634
Pisd-ps1	18684.5	-0.542106	0.147444	-3.6767	0.000236266	0.00832396
Fv1	280.944	-0.550282	0.138628	-3.9695	7.2e-05	0.00346605
2700038G22Rik	244.972	-0.584643	0.151625	-3.85584	0.000115331	0.00498196
Dapk1	2063.93	-0.591154	0.162059	-3.64777	0.000264526	0.00895796
A730098P11Rik	1732.08	-0.602773	0.115169	-5.23382	1.66e-07	3e-05
Vps52	4172.43	-0.61651	0.108198	-5.69797	1.21e-08	3.07e-06
Abhd15	330.126	-0.626851	0.15257	-4.10861	3.98e-05	0.00228261
Slc25a30	560.751	-0.632838	0.144195	-4.38876	1.14e-05	0.00083759
Mss51	252.947	-0.634759	0.156113	-4.06603	4.78e-05	0.00264996
Lmtk2	1980.84	-0.637862	0.137844	-4.6274	3.7e-06	0.00036491
4833420G17Rik	2181.12	-0.661063	0.17091	-3.86789	0.00010978	0.0048565
Ssc5d	2006.27	-0.662882	0.178014	-3.72376	0.000196275	0.00734922
Rasl11a	222.463	-0.687193	0.152797	-4.49741	6.88e-06	0.000574665
Gm5643	65.6591	-0.708573	0.166772	-4.24876	2.15e-05	0.00140945
Zfp57	686.825	-0.713725	0.120297	-5.93302	2.97e-09	8.74e-07
Ankrd6	267.217	-0.734278	0.171595	-4.27914	1.88e-05	0.00126032
Nnt	2525.33	-0.744647	0.124471	-5.98248	2.2e-09	7.09e-07
Pira2	65.4003	-0.764542	0.172334	-4.4364	9.15e-06	0.000706963
Cdk5rap1	703.239	-0.765554	0.210606	-3.63501	0.000277967	0.00926378
Padi2	647.463	-0.773219	0.159664	-4.84278	1.28e-06	0.000158434
Gja1	23189.3	-0.776331	0.196603	-3.94872	7.86e-05	0.00369453
F730043M19Rik	133.267	-0.779595	0.165379	-4.714	2.43e-06	0.000268303
Gm3002	870.087	-0.787881	0.161902	-4.86642	1.14e-06	0.000146113
Plekhh1	202.767	-0.79597	0.217937	-3.65229	0.00025991	0.0088502
Gm20939	149.214	-0.831451	0.212209	-3.91808	8.93e-05	0.00408048
Sfi1	3666.03	-0.851093	0.160097	-5.31612	1.06e-07	2.05e-05
Gm3500	65.3202	-0.851102	0.227523	-3.74072	0.000183491	0.00700671
Hoxd4	324.864	-0.873346	0.209227	-4.17416	2.99e-05	0.0018436
Gdpd3	1943.13	-0.882428	0.197204	-4.4747	7.65e-06	0.000623429
Tlcd2	959.949	-0.890355	0.196075	-4.54088	5.6e-06	0.000501064
Scn2b	278.449	-0.896406	0.242619	-3.6947	0.000220148	0.00798059
Nlrp1a	221.366	-0.900202	0.239513	-3.75846	0.000170959	0.0066048
Gm3558	192.033	-0.904629	0.18432	-4.90794	9.2e-07	0.000123153
Tmem25	49.8864	-0.91324	0.252254	-3.62032	0.000294239	0.00964997
Gm7444	22.8705	-0.925576	0.255714	-3.61957	0.00029509	0.00965526
Atp10d	1276.17	-0.941327	0.151828	-6.19996	5.65e-10	2.07e-07
H2-D1	20164.4	-0.94429	0.256175	-3.68611	0.000227708	0.0081016
Avpr1a	248.452	-0.953836	0.190716	-5.00134	5.69e-07	8.52e-05
LOC100861615	26.5362	-0.975806	0.219728	-4.44098	8.95e-06	0.000704525
AI607873	1633.52	-0.990078	0.22432	-4.41368	1.02e-05	0.000774343
Mpz	598.58	-0.997509	0.25618	-3.89379	9.87e-05	0.00443827
Ica1l	57.0386	-1.01401	0.272786	-3.71724	0.000201414	0.00743244
Gm6682	97.3421	-1.031	0.209642	-4.91793	8.75e-07	0.000120495
Tlr11	105.863	-1.06206	0.176241	-6.0262	1.68e-09	5.8e-07
Six4	38.2127	-1.07096	0.296855	-3.60769	0.000308931	0.00991108
2410018L13Rik	117.344	-1.08478	0.251897	-4.30642	1.66e-05	0.00113305
Derl3	55.5609	-1.12252	0.246106	-4.56114	5.09e-06	0.000465188
St6galnac5	81.9635	-1.13722	0.295125	-3.85336	0.000116509	0.00501967
Ddit4l	407.992	-1.14875	0.262244	-4.38046	1.18e-05	0.000862417
Zfp369	57.4955	-1.16803	0.249077	-4.68942	2.74e-06	0.000289043
Cxcl11	32.1781	-1.17825	0.30938	-3.80843	0.000139851	0.00575415
Ddn	15.4054	-1.2013	0.319408	-3.76102	0.000169221	0.00659818
Tmod1	431.593	-1.20851	0.210526	-5.74041	9.44e-09	2.47e-06
H2-Bl	29.9745	-1.21841	0.249313	-4.88708	1.02e-06	0.000134094
A930017M01Rik	16.1863	-1.22232	0.324361	-3.76839	0.000164307	0.00646929
Trim9	104.055	-1.22374	0.305825	-4.00142	6.3e-05	0.0031787
Mcoln3	56.4121	-1.26305	0.339355	-3.72191	0.000197723	0.00734922
Itga8	5751.69	-1.26399	0.315245	-4.00955	6.08e-05	0.00312881
Clec3b	1767.72	-1.26734	0.288192	-4.39755	1.09e-05	0.000815308
Klf14	8.211	-1.27018	0.33681	-3.7712	0.000162464	0.00645852
Vnn3	45.6986	-1.27032	0.346076	-3.67063	0.000241958	0.00844634
Pmel	930.737	-1.2715	0.34531	-3.6822	0.000231231	0.00817832
C920009B18Rik	319.409	-1.28575	0.314365	-4.08999	4.31e-05	0.00244823
Dusp13	83.4228	-1.29072	0.336148	-3.83973	0.000123168	0.00525155
Syt4	1480.13	-1.32778	0.336339	-3.94774	7.89e-05	0.00369913
Btnl2	119.12	-1.33829	0.277973	-4.81448	1.48e-06	0.000178598
Cplx1	8.88005	-1.34128	0.343645	-3.9031	9.5e-05	0.00430577
Oca2	66.3288	-1.36182	0.342149	-3.9802	6.89e-05	0.00338281
Pzp	10.3735	-1.38249	0.336871	-4.10392	4.06e-05	0.0023213
H2-Q2	13.2763	-1.39042	0.308401	-4.5085	6.53e-06	0.000562561
Zfp459	108.481	-1.40708	0.235095	-5.98513	2.16e-09	7.09e-07
3110070M22Rik	16.4692	-1.42446	0.319272	-4.46158	8.14e-06	0.000659606
Pacsin1	56.0188	-1.44058	0.323741	-4.4498	8.59e-06	0.000683354
H60b	200.417	-1.44858	0.325899	-4.44488	8.79e-06	0.000695843
Clcnka	9.2115	-1.5301	0.344605	-4.44015	8.99e-06	0.000704525
Fam19a1	25.9285	-1.55833	0.330888	-4.70955	2.48e-06	0.000272394
Grik1	94.964	-1.57013	0.284558	-5.51778	3.43e-08	7.74e-06
Gm10825	200.822	-1.61523	0.302942	-5.33181	9.72e-08	1.92e-05
Ccl28	17.2848	-1.62038	0.337734	-4.79779	1.6e-06	0.000191324
Pirt	169.343	-1.63567	0.34264	-4.77372	1.81e-06	0.000209607
Cldn11	309.713	-1.63822	0.316027	-5.1838	2.17e-07	3.75e-05
F630042J09Rik	11.6247	-1.65819	0.346071	-4.79148	1.66e-06	0.000194621
Gm5512	15.3076	-1.68903	0.305375	-5.531	3.18e-08	7.28e-06
9830147E19Rik	217.565	-1.75558	0.163491	-10.7381	6.74e-27	1.23e-23
Slc15a2	766.294	-1.79563	0.300578	-5.97394	2.32e-09	7.33e-07
Gm7120	284.516	-1.92624	0.172793	-11.1477	7.35e-29	2.02e-25
Zim1	85.2519	-1.94024	0.268451	-7.22752	4.92e-13	3.68e-10
Rhoj	3656.74	-2.01801	0.125835	-16.037	7.05e-58	3.87e-54
E030013I19Rik	144.206	-2.02046	0.32149	-6.28467	3.29e-10	1.29e-07
Rab3b	310.443	-2.1337	0.336463	-6.34155	2.27e-10	9.6e-08
Mucl1	51.2494	-2.14848	0.344657	-6.23367	4.56e-10	1.7e-07
Pcsk9	48.9461	-2.61348	0.295425	-8.84651	9.03e-19	1.24e-15
BC033916	75.1923	-2.63249	0.270418	-9.7349	2.14e-22	3.2e-19
BC147527	43.7969	-2.87712	0.345099	-8.33709	7.61e-17	7.83e-14
H2-Q1	98.287	-3.81191	0.286094	-13.324	1.68e-40	6.91e-37
H2-Ea-ps	237.008	-5.2214	0.313786	-16.64	3.57e-62	2.94e-58

## Sheet: Top 50 underexpressed genes
	baseMean	log2FoldChange	lfcSE	stat	pvalue	padj
Zfp369	57.4955	-1.16803	0.249077	-4.68942	2.74e-06	0.000289043
Derl3	55.5609	-1.12252	0.246106	-4.56114	5.09e-06	0.000465188
Pacsin1	56.0188	-1.44058	0.323741	-4.4498	8.59e-06	0.000683354
H2-Q1	98.287	-3.81191	0.286094	-13.324	1.68e-40	6.91e-37
BC033916	75.1923	-2.63249	0.270418	-9.7349	2.14e-22	3.2e-19
Grik1	94.964	-1.57013	0.284558	-5.51778	3.43e-08	7.74e-06
Zim1	85.2519	-1.94024	0.268451	-7.22752	4.92e-13	3.68e-10
St6galnac5	81.9635	-1.13722	0.295125	-3.85336	0.000116509	0.00501967
Dusp13	83.4228	-1.29072	0.336148	-3.83973	0.000123168	0.00525155
Btnl2	119.12	-1.33829	0.277973	-4.81448	1.48e-06	0.000178598
Zfp459	108.481	-1.40708	0.235095	-5.98513	2.16e-09	7.09e-07
Trim9	104.055	-1.22374	0.305825	-4.00142	6.3e-05	0.0031787
E030013I19Rik	144.206	-2.02046	0.32149	-6.28467	3.29e-10	1.29e-07
Pirt	169.343	-1.63567	0.34264	-4.77372	1.81e-06	0.000209607
H2-Ea-ps	237.008	-5.2214	0.313786	-16.64	3.57e-62	2.94e-58
C920009B18Rik	319.409	-1.28575	0.314365	-4.08999	4.31e-05	0.00244823
Cldn11	309.713	-1.63822	0.316027	-5.1838	2.17e-07	3.75e-05
Gm7120	284.516	-1.92624	0.172793	-11.1477	7.35e-29	2.02e-25
9830147E19Rik	217.565	-1.75558	0.163491	-10.7381	6.74e-27	1.23e-23
Gm10825	200.822	-1.61523	0.302942	-5.33181	9.72e-08	1.92e-05
H60b	200.417	-1.44858	0.325899	-4.44488	8.79e-06	0.000695843
Rab3b	310.443	-2.1337	0.336463	-6.34155	2.27e-10	9.6e-08
Slc15a2	766.294	-1.79563	0.300578	-5.97394	2.32e-09	7.33e-07
Pmel	930.737	-1.2715	0.34531	-3.6822	0.000231231	0.00817832
Tmod1	431.593	-1.20851	0.210526	-5.74041	9.44e-09	2.47e-06
Ddit4l	407.992	-1.14875	0.262244	-4.38046	1.18e-05	0.000862417
Cxcl11	32.1781	-1.17825	0.30938	-3.80843	0.000139851	0.00575415
H2-Bl	29.9745	-1.21841	0.249313	-4.88708	1.02e-06	0.000134094
Fam19a1	25.9285	-1.55833	0.330888	-4.70955	2.48e-06	0.000272394
Mucl1	51.2494	-2.14848	0.344657	-6.23367	4.56e-10	1.7e-07
BC147527	43.7969	-2.87712	0.345099	-8.33709	7.61e-17	7.83e-14
Pcsk9	48.9461	-2.61348	0.295425	-8.84651	9.03e-19	1.24e-15
Vnn3	45.6986	-1.27032	0.346076	-3.67063	0.000241958	0.00844634
Oca2	66.3288	-1.36182	0.342149	-3.9802	6.89e-05	0.00338281
Mcoln3	56.4121	-1.26305	0.339355	-3.72191	0.000197723	0.00734922
A930006K02Rik	33.7741	0.902243	0.239342	3.76968	0.000163457	0.00646929
3110070M22Rik	16.4692	-1.42446	0.319272	-4.46158	8.14e-06	0.000659606
Gm5512	15.3076	-1.68903	0.305375	-5.531	3.18e-08	7.28e-06
Ccl28	17.2848	-1.62038	0.337734	-4.79779	1.6e-06	0.000191324
Ddn	15.4054	-1.2013	0.319408	-3.76102	0.000169221	0.00659818
H2-Q2	13.2763	-1.39042	0.308401	-4.5085	6.53e-06	0.000562561
Clcnka	9.2115	-1.5301	0.344605	-4.44015	8.99e-06	0.000704525
Klf14	8.211	-1.27018	0.33681	-3.7712	0.000162464	0.00645852
Cplx1	8.88005	-1.34128	0.343645	-3.9031	9.5e-05	0.00430577
F630042J09Rik	11.6247	-1.65819	0.346071	-4.79148	1.66e-06	0.000194621
Pzp	10.3735	-1.38249	0.336871	-4.10392	4.06e-05	0.0023213
Itga8	5751.69	-1.26399	0.315245	-4.00955	6.08e-05	0.00312881
Rhoj	3656.74	-2.01801	0.125835	-16.037	7.05e-58	3.87e-54
Clec3b	1767.72	-1.26734	0.288192	-4.39755	1.09e-05	0.000815308
Syt4	1480.13	-1.32778	0.336339	-3.94774	7.89e-05	0.00369913

## Sheet: Top 50 over expressed genes
	baseMean	log2FoldChange	lfcSE	stat	pvalue	padj
Gm16907	126.881	1.49026	0.192499	7.74164	9.81e-15	9.5e-12
Mir6236	123.672	1.68168	0.200702	8.37901	5.34e-17	5.86e-14
C920006O11Rik	133.783	1.57508	0.249373	6.31615	2.68e-10	1.1e-07
Rab11fip4	193.227	1.28594	0.323942	3.96967	7.2e-05	0.00346605
Fam69c	165.71	1.34558	0.32292	4.1669	3.09e-05	0.00188908
Saa1	204.559	1.24487	0.337123	3.69264	0.00022194	0.0080279
Zfp429	275.71	1.3174	0.155267	8.48473	2.16e-17	2.54e-14
Vax2os	265.939	1.24512	0.310922	4.0046	6.21e-05	0.0031556
Rims1	265.827	1.27881	0.331973	3.85214	0.000117092	0.00503161
Foxc2	225.099	1.38844	0.283283	4.90126	9.52e-07	0.000126388
Cxcl5	280.297	1.4954	0.34559	4.32709	1.51e-05	0.00106269
Opcml	1008.94	1.65422	0.294213	5.62252	1.88e-08	4.49e-06
Ccdc37	827.877	1.66505	0.215507	7.72619	1.11e-14	9.6e-12
Ptx3	655.066	1.3031	0.279177	4.66763	3.05e-06	0.000315387
Gm14322	529.874	1.40755	0.306907	4.58626	4.51e-06	0.000421978
2610507I01Rik	669.421	3.2119	0.107262	29.9443	5.22e-197	8.59e-193
Rab6b	679.198	3.10624	0.288352	10.7724	4.65e-27	9.56e-24
Xkr7	637.152	1.65258	0.34607	4.77527	1.79e-06	0.000209474
Gcg	443.105	1.4278	0.345341	4.13446	3.56e-05	0.0020775
Scube1	2778.37	1.31454	0.327274	4.01663	5.9e-05	0.00307468
Ccl2	2151.64	1.54862	0.223063	6.9425	3.85e-12	2.44e-09
Reln	1954.09	1.46977	0.329883	4.45542	8.37e-06	0.000675489
Abca13	46.1595	1.31571	0.345936	3.80334	0.000142758	0.00584456
A330093E20Rik	37.93	1.38441	0.312556	4.42933	9.45e-06	0.000723603
1700030C10Rik	55.6235	3.10421	0.297918	10.4197	2.02e-25	3.32e-22
4933433G19Rik	34.9156	1.2474	0.23401	5.33054	9.79e-08	1.92e-05
Celf3	35.2574	1.367	0.230796	5.92297	3.16e-09	9.12e-07
Spag17	43.3932	1.9957	0.319013	6.25586	3.95e-10	1.51e-07
3830403N18Rik	27.2007	1.48805	0.326957	4.55122	5.33e-06	0.000482312
Gm4956	26.3202	1.26056	0.346055	3.64267	0.000269825	0.00908887
Gm16617	26.137	1.33797	0.306705	4.36241	1.29e-05	0.000924521
Saa2	37.1534	1.5539	0.343582	4.52265	6.11e-06	0.000534634
C130026I21Rik	51.9346	1.4445	0.227634	6.3457	2.21e-10	9.59e-08
Nxpe2	44.5932	1.33068	0.255655	5.20499	1.94e-07	3.4e-05
Kng2	68.4185	1.24545	0.344928	3.61074	0.00030532	0.00986475
Mcpt2	70.8575	1.30694	0.345816	3.77929	0.000157275	0.00629788
5830444B04Rik	95.5398	1.92682	0.323425	5.95753	2.56e-09	7.8e-07
A2m	117.393	1.6856	0.34215	4.92648	8.37e-07	0.000116774
Slc5a12	14.2822	1.43871	0.320522	4.48863	7.17e-06	0.000592832
4930579G18Rik	271.354	0.758831	0.196239	3.86687	0.000110243	0.0048565
Gm5	13.445	1.39493	0.345171	4.04128	5.32e-05	0.00283138
Rmrp	12.6989	2.06721	0.343114	6.02484	1.69e-09	5.8e-07
Rpph1	11.5874	2.14314	0.334754	6.40215	1.53e-10	7e-08
Grm7	18.5949	1.6645	0.293619	5.66891	1.44e-08	3.53e-06
Gm2447	16.5507	1.35477	0.321082	4.21937	2.45e-05	0.00156435
Rec8	25.1713	1.24346	0.337253	3.68701	0.000226901	0.00810052
Ccl11	8601.51	1.3037	0.269443	4.83852	1.31e-06	0.000160665
Col28a1	8267.38	1.33046	0.301775	4.40878	1.04e-05	0.000781322
Lars2	13330.5	1.57472	0.128707	12.2349	2.02e-34	6.66e-31
Rn45s	60556.2	1.63059	0.148093	11.0105	3.4e-28	7.99e-25

## Sheet: Apoptosis genes
	baseMean	log2FoldChange	lfcSE	stat	pvalue	padj
Dapk1	2063.93	-0.591154	0.162059	-3.64777	0.000264526	0.00895796
Bcl6	3368.8	-0.4457	0.119741	-3.72219	0.000197503	0.00734922
Fastk	3336.09	0.217202	0.0543777	3.99431	6.49e-05	0.00323924
Bad	1553.91	0.323626	0.0744265	4.34826	1.37e-05	0.000981895
Casp2	2809.45	-0.366638	0.0958716	-3.82426	0.000131163	0.00550684
Trp53	4719.08	-0.317169	0.0715979	-4.42986	9.43e-06	0.000723603
Atg4b	2788.67	-0.203395	0.0560372	-3.62965	0.000283806	0.00939816
